# Supplementary material for: Finding combinatorial histone code by semi-supervised biclustering
Source: PubMed Central journal article supplement (PMC3443427; doi:10.1186/1471-2164-13-301), 2012-07-03
Supplement: 1471-2164-13-301-S1.pdf [file 1471-2164-13-301-S1.pdf]

**Table S1. List of 362 combinatorial histone modifications identified by tandem mass spectrometry.** Each row represents a set of histone modifications observed within the same single histone tail. Data were obtained from the following publications: [1-4]

| <b>Combinatorial histone modifications</b>                | <b>Reference</b>                 |
|-----------------------------------------------------------|----------------------------------|
| H3K14ac,H3K18ac,H3K23ac,H3K27ac,H3K36me1,H3K9me3          | LeRoy G. et al.                  |
| H3K14ac,H3K18ac,H3K23ac,H3K27ac,H3K36me2,H3K4me1,H3K9ac   | LeRoy G. et al.                  |
| H3K14ac,H3K18ac,H3K23ac,H3K27ac,H3K36me2,H3K4me2,H3K9ac   | LeRoy G. et al.                  |
| H3K14ac,H3K18ac,H3K23ac,H3K27ac,H3K36me2,H3K4me3,H3K9me2  | LeRoy G. et al.                  |
| H3K14ac,H3K18ac,H3K23ac,H3K27ac,H3K36me2,H3K9me1          | LeRoy G. et al.                  |
| H3K14ac,H3K18ac,H3K23ac,H3K27ac,H3K36me2,H3K9me2          | LeRoy G. et al.                  |
| H3K14ac,H3K18ac,H3K23ac,H3K27ac,H3K36me3,H3K4me1          | LeRoy G. et al.                  |
| H3K14ac,H3K18ac,H3K23ac,H3K27ac,H3K36me3,H3K4me1,H3K9ac   | LeRoy G. et al.                  |
| H3K14ac,H3K18ac,H3K23ac,H3K27ac,H3K36me3,H3K9ac           | LeRoy G. et al.                  |
| H3K14ac,H3K18ac,H3K23ac,H3K27ac,H3K36me3,H3K9me1          | LeRoy G. et al.                  |
| H3K14ac,H3K18ac,H3K23ac,H3K27ac,H3K4me1,H3K9me3           | LeRoy G. et al.                  |
| H3K14ac,H3K18ac,H3K23ac,H3K27me1,H3K36me1,H3K4me1,H3K9me2 | Garcia B. et al.                 |
| H3K14ac,H3K18ac,H3K23ac,H3K27me1,H3K36me1,H3K9me1         | LeRoy G. et al.                  |
| H3K14ac,H3K18ac,H3K23ac,H3K27me1,H3K36me2,H3K4me1         | Garcia B. et al.                 |
| H3K14ac,H3K18ac,H3K23ac,H3K27me1,H3K36me2,H3K4me1,H3K9ac  | LeRoy G. et al.                  |
| H3K14ac,H3K18ac,H3K23ac,H3K27me1,H3K36me2,H3K4me1,H3K9me1 | Garcia B. et al.                 |
| H3K14ac,H3K18ac,H3K23ac,H3K27me1,H3K36me2,H3K4me1,H3K9me2 | Garcia B. et al. LeRoy G. et al. |
| H3K14ac,H3K18ac,H3K23ac,H3K27me1,H3K36me2,H3K4me1,H3K9me3 | LeRoy G. et al.                  |
| H3K14ac,H3K18ac,H3K23ac,H3K27me1,H3K36me2,H3K9me1         | Garcia B. et al. LeRoy G. et al. |
| H3K14ac,H3K18ac,H3K23ac,H3K27me1,H3K36me2,H3K9me2         | LeRoy G. et al.                  |
| H3K14ac,H3K18ac,H3K23ac,H3K27me1,H3K36me2,H3K9me3         | Garcia B. et al. LeRoy G. et al. |
| H3K14ac,H3K18ac,H3K23ac,H3K27me1,H3K36me3,H3K4me1,H3K9me1 | LeRoy G. et al.                  |
| H3K14ac,H3K18ac,H3K23ac,H3K27me1,H3K36me3,H3K4me1,H3K9me3 | LeRoy G. et al.                  |
| H3K14ac,H3K18ac,H3K23ac,H3K27me1,H3K36me3,H3K4me2,H3K9me2 | LeRoy G. et al.                  |
| H3K14ac,H3K18ac,H3K23ac,H3K27me1,H3K36me3,H3K4me2,H3K9me3 | LeRoy G. et al.                  |
| H3K14ac,H3K18ac,H3K23ac,H3K27me1,H3K36me3,H3K4me3,H3K9ac  | LeRoy G. et al.                  |
| H3K14ac,H3K18ac,H3K23ac,H3K27me1,H3K36me3,H3K4me3,H3K9me2 | LeRoy G. et al.                  |
| H3K14ac,H3K18ac,H3K23ac,H3K27me1,H3K36me3,H3K9ac          | LeRoy G. et al.                  |
| H3K14ac,H3K18ac,H3K23ac,H3K27me1,H3K36me3,H3K9me1         | LeRoy G. et al.                  |
| H3K14ac,H3K18ac,H3K23ac,H3K27me1,H3K36me3,H3K9me3         | LeRoy G. et al.                  |
| H3K14ac,H3K18ac,H3K23ac,H3K27me1,H3K4me2,H3K9me3          | LeRoy G. et al.                  |
| H3K14ac,H3K18ac,H3K23ac,H3K27me1,H3K9me2                  | LeRoy G. et al.                  |
| H3K14ac,H3K18ac,H3K23ac,H3K27me2                          | LeRoy G. et al.                  |
| H3K14ac,H3K18ac,H3K23ac,H3K27me2,H3K36me1                 | Garcia B. et al.                 |
| H3K14ac,H3K18ac,H3K23ac,H3K27me2,H3K36me1,H3K4me1         | Garcia B. et al.                 |
| H3K14ac,H3K18ac,H3K23ac,H3K27me2,H3K36me1,H3K4me1,H3K9ac  | LeRoy G. et al.                  |
| H3K14ac,H3K18ac,H3K23ac,H3K27me2,H3K36me1,H3K4me1,H3K9me2 | LeRoy G. et al.                  |
| H3K14ac,H3K18ac,H3K23ac,H3K27me2,H3K36me1,H3K4me1,H3K9me3 | LeRoy G. et al.                  |
| H3K14ac,H3K18ac,H3K23ac,H3K27me2,H3K36me1,H3K4me3,H3K9me2 | LeRoy G. et al.                  |
| H3K14ac,H3K18ac,H3K23ac,H3K27me2,H3K36me1,H3K9me1         | Garcia B. et al.                 |



|                                                           |                                  |
|-----------------------------------------------------------|----------------------------------|
| H3K14ac,H3K18ac,H3K23ac,H3K27me3,H3K36me1,H3K9me1         | LeRoy G. et al.                  |
| H3K14ac,H3K18ac,H3K23ac,H3K27me3,H3K36me1,H3K9me2         | Garcia B. et al. LeRoy G. et al. |
| H3K14ac,H3K18ac,H3K23ac,H3K27me3,H3K36me1,H3K9me3         | Garcia B. et al.                 |
| H3K14ac,H3K18ac,H3K23ac,H3K27me3,H3K36me2,H3K4me1,H3K9ac  | LeRoy G. et al.                  |
| H3K14ac,H3K18ac,H3K23ac,H3K27me3,H3K36me2,H3K4me1,H3K9me1 | LeRoy G. et al.                  |
| H3K14ac,H3K18ac,H3K23ac,H3K27me3,H3K36me2,H3K4me1,H3K9me2 | Garcia B. et al. LeRoy G. et al. |
| H3K14ac,H3K18ac,H3K23ac,H3K27me3,H3K36me2,H3K4me2,H3K9me1 | LeRoy G. et al.                  |
| H3K14ac,H3K18ac,H3K23ac,H3K27me3,H3K36me2,H3K4me2,H3K9me2 | LeRoy G. et al.                  |
| H3K14ac,H3K18ac,H3K23ac,H3K27me3,H3K36me2,H3K4me3,H3K9me1 | LeRoy G. et al.                  |
| H3K14ac,H3K18ac,H3K23ac,H3K27me3,H3K36me2,H3K9me1         | LeRoy G. et al.                  |
| H3K14ac,H3K18ac,H3K23ac,H3K27me3,H3K36me2,H3K9me2         | LeRoy G. et al.                  |
| H3K14ac,H3K18ac,H3K23ac,H3K27me3,H3K36me2,H3K9me3         | Garcia B. et al.                 |
| H3K14ac,H3K18ac,H3K23ac,H3K27me3,H3K36me3,H3K4me1,H3K9me2 | LeRoy G. et al.                  |
| H3K14ac,H3K18ac,H3K23ac,H3K27me3,H3K36me3,H3K4me2,H3K9me3 | LeRoy G. et al.                  |
| H3K14ac,H3K18ac,H3K23ac,H3K27me3,H3K36me3,H3K4me3,H3K9me2 | LeRoy G. et al.                  |
| H3K14ac,H3K18ac,H3K23ac,H3K27me3,H3K36me3,H3K4me3,H3K9me3 | LeRoy G. et al.                  |
| H3K14ac,H3K18ac,H3K23ac,H3K27me3,H3K36me3,H3K9me1         | LeRoy G. et al.                  |
| H3K14ac,H3K18ac,H3K23ac,H3K27me3,H3K4me1                  | Garcia B. et al.                 |
| H3K14ac,H3K18ac,H3K23ac,H3K27me3,H3K4me1,H3K9ac           | LeRoy G. et al.                  |
| H3K14ac,H3K18ac,H3K23ac,H3K27me3,H3K4me1,H3K9me1          | LeRoy G. et al.                  |
| H3K14ac,H3K18ac,H3K23ac,H3K27me3,H3K4me1,H3K9me2          | Garcia B. et al. LeRoy G. et al. |
| H3K14ac,H3K18ac,H3K23ac,H3K27me3,H3K9me1                  | LeRoy G. et al.                  |
| H3K14ac,H3K18ac,H3K23ac,H3K27me3,H3K9me2                  | Garcia B. et al. LeRoy G. et al. |
| H3K14ac,H3K18ac,H3K23ac,H3K27me3,H3K9me3                  | LeRoy G. et al.                  |
| H3K14ac,H3K18ac,H3K23ac,H3K36me1,H3K9me2                  | LeRoy G. et al.                  |
| H3K14ac,H3K18ac,H3K23ac,H3K36me2,H3K9me1                  | LeRoy G. et al.                  |
| H3K14ac,H3K18ac,H3K23ac,H3K36me2,H3K9me3                  | Garcia B. et al.                 |
| H3K14ac,H3K18ac,H3K23ac,H3K36me3,H3K4me1,H3K9ac           | LeRoy G. et al.                  |
| H3K14ac,H3K18ac,H3K23ac,H3K36me3,H3K4me1,H3K9me2          | LeRoy G. et al.                  |
| H3K14ac,H3K18ac,H3K23ac,H3K36me3,H3K4me1,H3K9me3          | LeRoy G. et al.                  |
| H3K14ac,H3K18ac,H3K23ac,H3K36me3,H3K4me2,H3K9ac           | LeRoy G. et al.                  |
| H3K14ac,H3K18ac,H3K23ac,H3K36me3,H3K4me3,H3K9me3          | LeRoy G. et al.                  |
| H3K14ac,H3K18ac,H3K23ac,H3K36me3,H3K9me3                  | LeRoy G. et al.                  |
| H3K14ac,H3K18ac,H3K27me3,H3K36me3,H3K4me1,H3K9me2         | LeRoy G. et al.                  |
| H3K14ac,H3K23ac                                           | LeRoy G. et al.                  |
| H3K14ac,H3K23ac,H3K27me1                                  | LeRoy G. et al.                  |
| H3K14ac,H3K23ac,H3K27me1,H3K36me1                         | Garcia B. et al. LeRoy G. et al. |
| H3K14ac,H3K23ac,H3K27me1,H3K36me1,H3K9me1                 | LeRoy G. et al.                  |
| H3K14ac,H3K23ac,H3K27me1,H3K36me1,H3K9me3                 | Garcia B. et al. LeRoy G. et al. |
| H3K14ac,H3K23ac,H3K27me1,H3K36me2,H3K4me1,H3K9me1         | Garcia B. et al.                 |
| H3K14ac,H3K23ac,H3K27me1,H3K36me2,H3K4me1,H3K9me2         | LeRoy G. et al.                  |
| H3K14ac,H3K23ac,H3K27me1,H3K36me2,H3K9me2                 | Garcia B. et al. LeRoy G. et al. |

|                                                   |                                                   |
|---------------------------------------------------|---------------------------------------------------|
| H3K14ac,H3K23ac,H3K27me1,H3K36me2,H3K9me3         | Garcia B. et al. LeRoy G. et al.                  |
| H3K14ac,H3K23ac,H3K27me1,H3K36me3,H3K4me1,H3K9me3 | LeRoy G. et al.                                   |
| H3K14ac,H3K23ac,H3K27me1,H3K4me1,H3K9me2          | Garcia B. et al.                                  |
| H3K14ac,H3K23ac,H3K27me1,H3K9me2                  | Garcia B. et al. LeRoy G. et al.                  |
| H3K14ac,H3K23ac,H3K27me1,H3K9me3                  | LeRoy G. et al.                                   |
| H3K14ac,H3K23ac,H3K27me2                          | Garcia B. et al. Garcia B. et al. LeRoy G. et al. |
| H3K14ac,H3K23ac,H3K27me2,H3K36me1                 | LeRoy G. et al.                                   |
| H3K14ac,H3K23ac,H3K27me2,H3K36me1,H3K4me1,H3K9me1 | Garcia B. et al.                                  |
| H3K14ac,H3K23ac,H3K27me2,H3K36me1,H3K9me2         | Garcia B. et al. LeRoy G. et al.                  |
| H3K14ac,H3K23ac,H3K27me2,H3K36me1,H3K9me3         | Garcia B. et al. LeRoy G. et al.                  |
| H3K14ac,H3K23ac,H3K27me2,H3K36me2,H3K4me1         | Garcia B. et al.                                  |
| H3K14ac,H3K23ac,H3K27me2,H3K36me2,H3K4me1,H3K9me2 | Garcia B. et al. LeRoy G. et al.                  |
| H3K14ac,H3K23ac,H3K27me2,H3K36me2,H3K4me1,H3K9me3 | LeRoy G. et al.                                   |
| H3K14ac,H3K23ac,H3K27me2,H3K36me2,H3K9me1         | Garcia B. et al.                                  |
| H3K14ac,H3K23ac,H3K27me2,H3K36me2,H3K9me2         | Garcia B. et al. LeRoy G. et al.                  |
| H3K14ac,H3K23ac,H3K27me2,H3K36me2,H3K9me3         | Garcia B. et al. LeRoy G. et al.                  |
| H3K14ac,H3K23ac,H3K27me2,H3K36me3,H3K4me1,H3K9me1 | LeRoy G. et al.                                   |
| H3K14ac,H3K23ac,H3K27me2,H3K36me3,H3K4me1,H3K9me3 | LeRoy G. et al.                                   |
| H3K14ac,H3K23ac,H3K27me2,H3K36me3,H3K9me3         | LeRoy G. et al.                                   |
| H3K14ac,H3K23ac,H3K27me2,H3K4me1,H3K9me2          | Garcia B. et al.                                  |
| H3K14ac,H3K23ac,H3K27me2,H3K9me1                  | Garcia B. et al. LeRoy G. et al.                  |
| H3K14ac,H3K23ac,H3K27me2,H3K9me2                  | Garcia B. et al. LeRoy G. et al.                  |
| H3K14ac,H3K23ac,H3K27me2,H3K9me3                  | LeRoy G. et al.                                   |
| H3K14ac,H3K23ac,H3K27me3                          | Garcia B. et al. LeRoy G. et al.                  |
| H3K14ac,H3K23ac,H3K27me3,H3K36me1                 | LeRoy G. et al.                                   |
| H3K14ac,H3K23ac,H3K27me3,H3K36me1,H3K4me1,H3K9me1 | Garcia B. et al.                                  |
| H3K14ac,H3K23ac,H3K27me3,H3K36me1,H3K4me1,H3K9me2 | LeRoy G. et al.                                   |
| H3K14ac,H3K23ac,H3K27me3,H3K36me1,H3K9me1         | LeRoy G. et al.                                   |
| H3K14ac,H3K23ac,H3K27me3,H3K36me1,H3K9me2         | Garcia B. et al. LeRoy G. et al.                  |
| H3K14ac,H3K23ac,H3K27me3,H3K36me1,H3K9me3         | Garcia B. et al.                                  |
| H3K14ac,H3K23ac,H3K27me3,H3K36me2,H3K4me1,H3K9me1 | LeRoy G. et al.                                   |
| H3K14ac,H3K23ac,H3K27me3,H3K36me2,H3K4me1,H3K9me2 | Garcia B. et al. LeRoy G. et al.                  |
| H3K14ac,H3K23ac,H3K27me3,H3K36me2,H3K9me2         | Garcia B. et al. LeRoy G. et al.                  |
| H3K14ac,H3K23ac,H3K27me3,H3K36me2,H3K9me3         | Garcia B. et al. LeRoy G. et al.                  |

|                                           |                                  |
|-------------------------------------------|----------------------------------|
| H3K14ac,H3K23ac,H3K27me3,H3K4me1          | Garcia B. et al.                 |
| H3K14ac,H3K23ac,H3K27me3,H3K4me1,H3K9me1  | Garcia B. et al.                 |
| H3K14ac,H3K23ac,H3K27me3,H3K4me1,H3K9me2  | Garcia B. et al.                 |
| H3K14ac,H3K23ac,H3K27me3,H3K9me1          | Garcia B. et al. LeRoy G. et al. |
| H3K14ac,H3K23ac,H3K27me3,H3K9me2          | Garcia B. et al. LeRoy G. et al. |
| H3K14ac,H3K23ac,H3K27me3,H3K9me3          | Garcia B. et al. LeRoy G. et al. |
| H3K14ac,H3K23ac,H3K36me1,H3K9me2          | LeRoy G. et al.                  |
| H3K14ac,H3K23ac,H3K36me2                  | LeRoy G. et al.                  |
| H3K14ac,H3K23ac,H3K36me2,H3K4me1,H3K9me2  | Garcia B. et al.                 |
| H3K14ac,H3K23ac,H3K36me2,H3K9me2          | Garcia B. et al.                 |
| H3K14ac,H3K23ac,H3K36me2,H3K9me3          | LeRoy G. et al.                  |
| H3K14ac,H3K23ac,H3K36me3,H3K9me3          | LeRoy G. et al.                  |
| H3K14ac,H3K23ac,H3K4me1,H3K9me2           | Garcia B. et al.                 |
| H3K14ac,H3K23ac,H3K9me2                   | Garcia B. et al.                 |
| H3K14ac,H3K23ac,H3K9me3                   | Garcia B. et al.                 |
| H3K14ac,H3K27me1,H3K36me1,H3K4me1,H3K9me2 | Garcia B. et al.                 |
| H3K14ac,H3K27me1,H3K36me1,H3K9me3         | LeRoy G. et al.                  |
| H3K14ac,H3K27me1,H3K36me2,H3K4me1,H3K9me2 | Garcia B. et al.                 |
| H3K14ac,H3K27me1,H3K36me2,H3K9me2         | Garcia B. et al.                 |
| H3K14ac,H3K27me1,H3K36me2,H3K9me3         | Garcia B. et al. LeRoy G. et al. |
| H3K14ac,H3K27me1,H3K9me1                  | Garcia B. et al.                 |
| H3K14ac,H3K27me1,H3K9me2                  | Garcia B. et al.                 |
| H3K14ac,H3K27me1,H3K9me3                  | Garcia B. et al. LeRoy G. et al. |
| H3K14ac,H3K27me2                          | Garcia B. et al.                 |
| H3K14ac,H3K27me2,H3K36me1,H3K9me2         | Garcia B. et al. LeRoy G. et al. |
| H3K14ac,H3K27me2,H3K36me1,H3K9me3         | LeRoy G. et al.                  |
| H3K14ac,H3K27me2,H3K36me2                 | Garcia B. et al.                 |
| H3K14ac,H3K27me2,H3K36me2,H3K4me1,H3K9me2 | Garcia B. et al. LeRoy G. et al. |
| H3K14ac,H3K27me2,H3K36me2,H3K9me2         | Garcia B. et al. LeRoy G. et al. |
| H3K14ac,H3K27me2,H3K36me2,H3K9me3         | Garcia B. et al. LeRoy G. et al. |
| H3K14ac,H3K27me2,H3K36me3,H3K4me1,H3K9me1 | LeRoy G. et al.                  |
| H3K14ac,H3K27me2,H3K36me3,H3K4me1,H3K9me2 | LeRoy G. et al.                  |
| H3K14ac,H3K27me2,H3K36me3,H3K9me2         | LeRoy G. et al.                  |
| H3K14ac,H3K27me2,H3K9me1                  | Garcia B. et al.                 |
| H3K14ac,H3K27me2,H3K9me2                  | Garcia B. et al. LeRoy G. et al. |
| H3K14ac,H3K27me2,H3K9me3                  | Garcia B. et al. LeRoy G. et al. |
| H3K14ac,H3K27me3,H3K36me1                 | Garcia B. et al.                 |
| H3K14ac,H3K27me3,H3K36me1,H3K9me2         | LeRoy G. et al.                  |

|                                           |                                  |
|-------------------------------------------|----------------------------------|
| H3K14ac,H3K27me3,H3K36me2,H3K4me1,H3K9me1 | LeRoy G. et al.                  |
| H3K14ac,H3K27me3,H3K36me2,H3K4me1,H3K9me2 | Garcia B. et al. LeRoy G. et al. |
| H3K14ac,H3K27me3,H3K36me2,H3K9me2         | Garcia B. et al. LeRoy G. et al. |
| H3K14ac,H3K27me3,H3K36me2,H3K9me3         | Garcia B. et al. LeRoy G. et al. |
| H3K14ac,H3K27me3,H3K4me1                  | Garcia B. et al.                 |
| H3K14ac,H3K27me3,H3K4me1,H3K9me1          | Garcia B. et al.                 |
| H3K14ac,H3K27me3,H3K9me2                  | Garcia B. et al. LeRoy G. et al. |
| H3K14ac,H3K27me3,H3K9me3                  | LeRoy G. et al.                  |
| H3K14ac,H3K36me1,H3K4me1,H3K9me2          | Garcia B. et al.                 |
| H3K14ac,H3K36me1,H3K9me3                  | Garcia B. et al.                 |
| H3K14ac,H3K36me2                          | Garcia B. et al.                 |
| H3K14ac,H3K36me2,H3K9me2                  | Garcia B. et al.                 |
| H3K14ac,H3K36me2,H3K9me3                  | LeRoy G. et al.                  |
| H3K14ac,H3K4me1,H3K9me2                   | Garcia B. et al.                 |
| H3K14ac,H3K9me2                           | Garcia B. et al.                 |
| H3K18ac,H3K23ac,H3K27me3,H3K4me1,H3K9me2  | Garcia B. et al.                 |
| H3K18ac,H3K27me2,H3K9me2                  | Garcia B. et al.                 |
| H3K23ac                                   | LeRoy G. et al.                  |
| H3K23ac,H3K27me1                          | Garcia B. et al.                 |
| H3K23ac,H3K27me1,H3K36me1,H3K9me3         | LeRoy G. et al.                  |
| H3K23ac,H3K27me1,H3K36me3,H3K9me3         | LeRoy G. et al.                  |
| H3K23ac,H3K27me1,H3K9me2                  | Garcia B. et al. LeRoy G. et al. |
| H3K23ac,H3K27me1,H3K9me3                  | LeRoy G. et al.                  |
| H3K23ac,H3K27me2                          | Garcia B. et al. LeRoy G. et al. |
| H3K23ac,H3K27me2,H3K36me1                 | LeRoy G. et al.                  |
| H3K23ac,H3K27me2,H3K36me1,H3K9me2         | Garcia B. et al.                 |
| H3K23ac,H3K27me2,H3K36me1,H3K9me3         | Garcia B. et al.                 |
| H3K23ac,H3K27me2,H3K36me2,H3K9me2         | Garcia B. et al.                 |
| H3K23ac,H3K27me2,H3K36me2,H3K9me3         | Garcia B. et al. LeRoy G. et al. |
| H3K23ac,H3K27me2,H3K4me1                  | Garcia B. et al.                 |
| H3K23ac,H3K27me2,H3K9me1                  | Garcia B. et al. LeRoy G. et al. |
| H3K23ac,H3K27me2,H3K9me2                  | Garcia B. et al. LeRoy G. et al. |
| H3K23ac,H3K27me2,H3K9me3                  | Garcia B. et al. LeRoy G. et al. |
| H3K23ac,H3K27me3                          | Garcia B. et al. LeRoy G. et al. |
| H3K23ac,H3K27me3,H3K36me1,H3K9me2         | Garcia B. et al.                 |
| H3K23ac,H3K27me3,H3K36me2,H3K9me2         | Garcia B. et al.                 |
| H3K23ac,H3K27me3,H3K9me1                  | Garcia B. et al. LeRoy G. et al. |

|                                   |                                  |
|-----------------------------------|----------------------------------|
| H3K23ac,H3K27me3,H3K9me2          | Garcia B. et al. LeRoy G. et al. |
| H3K23ac,H3K27me3,H3K9me3          | Garcia B. et al.                 |
| H3K23ac,H3K36me2,H3K9me3          | Garcia B. et al. LeRoy G. et al. |
| H3K23ac,H3K4me1,H3K9me2           | Garcia B. et al.                 |
| H3K23ac,H3K9me2                   | Garcia B. et al.                 |
| H3K23ac,H3K9me3                   | Garcia B. et al.                 |
| H3K27me1                          | Garcia B. et al. LeRoy G. et al. |
| H3K27me1,H3K36me1,H3K9me2         | Garcia B. et al.                 |
| H3K27me1,H3K36me1,H3K9me3         | LeRoy G. et al.                  |
| H3K27me1,H3K36me2                 | Garcia B. et al.                 |
| H3K27me1,H3K36me2,H3K9me1         | Garcia B. et al.                 |
| H3K27me1,H3K36me2,H3K9me2         | Garcia B. et al.                 |
| H3K27me1,H3K36me2,H3K9me3         | Garcia B. et al. LeRoy G. et al. |
| H3K27me1,H3K9me1                  | Garcia B. et al.                 |
| H3K27me1,H3K9me2                  | Garcia B. et al. LeRoy G. et al. |
| H3K27me1,H3K9me3                  | Garcia B. et al. LeRoy G. et al. |
| H3K27me2                          | Garcia B. et al.                 |
| H3K27me2,H3K36me1,H3K9me2         | LeRoy G. et al.                  |
| H3K27me2,H3K36me1,H3K9me3         | LeRoy G. et al.                  |
| H3K27me2,H3K36me2                 | Garcia B. et al.                 |
| H3K27me2,H3K36me2,H3K4me1,H3K9me2 | LeRoy G. et al.                  |
| H3K27me2,H3K36me2,H3K9me2         | Garcia B. et al. LeRoy G. et al. |
| H3K27me2,H3K36me2,H3K9me3         | Garcia B. et al. LeRoy G. et al. |
| H3K27me2,H3K36me3,H3K4me1,H3K9me1 | LeRoy G. et al.                  |
| H3K27me2,H3K36me3,H3K4me1,H3K9me2 | LeRoy G. et al.                  |
| H3K27me2,H3K9me1                  | Garcia B. et al.                 |
| H3K27me2,H3K9me2                  | Garcia B. et al. LeRoy G. et al. |
| H3K27me2,H3K9me3                  | Garcia B. et al. LeRoy G. et al. |
| H3K27me3                          | Garcia B. et al.                 |
| H3K27me3,H3K36me1,H3K4me1,H3K9me2 | LeRoy G. et al.                  |
| H3K27me3,H3K36me1,H3K9me2         | Garcia B. et al. LeRoy G. et al. |
| H3K27me3,H3K36me1,H3K9me3         | LeRoy G. et al.                  |
| H3K27me3,H3K36me2,H3K4me1,H3K9me1 | LeRoy G. et al.                  |
| H3K27me3,H3K36me2,H3K9me1         | Garcia B. et al.                 |
| H3K27me3,H3K36me2,H3K9me2         | Garcia B. et al. LeRoy G. et al. |
| H3K27me3,H3K36me2,H3K9me3         | LeRoy G. et al.                  |
| H3K27me3,H3K9me1                  | Garcia B. et al.                 |

|                                                |                                         |
|------------------------------------------------|-----------------------------------------|
| H3K27me3,H3K9me2                               | Garcia B. et al. LeRoy G. et al.        |
| H3K27me3,H3K9me3                               | Garcia B. et al. LeRoy G. et al.        |
| H3K36me1                                       | Garcia B. et al.                        |
| H3K36me1,H3K9me2                               | LeRoy G. et al.                         |
| H3K36me2                                       | Garcia B. et al.                        |
| H3K36me2,H3K9me1                               | Garcia B. et al.                        |
| H3K36me2,H3K9me2                               | Garcia B. et al.                        |
| H3K36me2,H3K9me3                               | Garcia B. et al.                        |
| H3K9me1                                        | Garcia B. et al.                        |
| H3K9me2                                        | Garcia B. et al. LeRoy G. et al.        |
| H3K9me3                                        | Garcia B. et al.                        |
| H4K12ac                                        | Phanstiel D. et al. Pesavento J. et al. |
| H4K12ac,H4K16ac                                | Phanstiel D. et al. Pesavento J. et al. |
| H4K12ac,H4K16ac,H4K20me1                       | Phanstiel D. et al. Pesavento J. et al. |
| H4K12ac,H4K16ac,H4K20me1,H4K5ac                | Phanstiel D. et al. Pesavento J. et al. |
| H4K12ac,H4K16ac,H4K20me1,H4K5ac,H4K8ac         | Phanstiel D. et al. Pesavento J. et al. |
| H4K12ac,H4K16ac,H4K20me1,H4K8ac                | Phanstiel D. et al. Pesavento J. et al. |
| H4K12ac,H4K16ac,H4K20me2                       | Phanstiel D. et al. Pesavento J. et al. |
| H4K12ac,H4K16ac,H4K20me2,H4K5ac                | Phanstiel D. et al. Pesavento J. et al. |
| H4K12ac,H4K16ac,H4K20me2,H4K5ac,H4K8ac         | Phanstiel D. et al. Pesavento J. et al. |
| H4K12ac,H4K16ac,H4K20me2,H4K5ac,H4K8ac,H4R3me1 | Phanstiel D. et al.                     |
| H4K12ac,H4K16ac,H4K20me2,H4K5ac,H4R3me1        | Phanstiel D. et al.                     |
| H4K12ac,H4K16ac,H4K20me2,H4K8ac                | Phanstiel D. et al. Pesavento J. et al. |
| H4K12ac,H4K16ac,H4K20me2,H4K8ac,H4R3me1        | Phanstiel D. et al.                     |
| H4K12ac,H4K16ac,H4K20me2,H4R3me1               | Phanstiel D. et al. Pesavento J. et al. |
| H4K12ac,H4K16ac,H4K20me2,H4R3me2               | Pesavento J. et al.                     |
| H4K12ac,H4K16ac,H4K20me3                       | Phanstiel D. et al.                     |
| H4K12ac,H4K16ac,H4K20me3,H4K5ac                | Phanstiel D. et al.                     |
| H4K12ac,H4K16ac,H4K20me3,H4K5ac,H4K8ac         | Phanstiel D. et al.                     |
| H4K12ac,H4K16ac,H4K20me3,H4K8ac                | Phanstiel D. et al.                     |
| H4K12ac,H4K16ac,H4K5ac                         | Phanstiel D. et al. Pesavento J. et al. |
| H4K12ac,H4K16ac,H4K5ac,H4K8ac                  | Phanstiel D. et al. Pesavento J. et al. |
| H4K12ac,H4K16ac,H4K8ac                         | Phanstiel D. et al.                     |



|                                        |                                            |
|----------------------------------------|--------------------------------------------|
|                                        | Pesavento J. et al.                        |
| H4K12ac,H4K20me1                       | Pesavento J. et al.                        |
| H4K12ac,H4K20me1,H4K5ac                | Pesavento J. et al.                        |
| H4K12ac,H4K20me1,H4K5ac,H4K8ac         | Phanstiel D. et al.                        |
| H4K12ac,H4K20me1,H4K8ac                | Pesavento J. et al.                        |
| H4K12ac,H4K20me2                       | Phanstiel D. et al.<br>Pesavento J. et al. |
| H4K12ac,H4K20me2,H4K5ac                | Pesavento J. et al.                        |
| H4K12ac,H4K20me2,H4K5ac,H4K8ac         | Phanstiel D. et al.                        |
| H4K12ac,H4K20me2,H4K5ac,H4K8ac,H4R3me1 | Phanstiel D. et al.                        |
| H4K12ac,H4K20me2,H4K8ac                | Phanstiel D. et al.<br>Pesavento J. et al. |
| H4K12ac,H4K20me2,H4R3me1               | Phanstiel D. et al.                        |
| H4K12ac,H4K20me3                       | Phanstiel D. et al.                        |
| H4K12ac,H4K20me3,H4K5ac,H4K8ac         | Phanstiel D. et al.                        |
| H4K12ac,H4K5ac                         | Pesavento J. et al.                        |
| H4K12ac,H4K5ac,H4K8ac                  | Phanstiel D. et al.                        |
| H4K12ac,H4K8ac                         | Pesavento J. et al.                        |
| H4K16ac                                | Phanstiel D. et al.<br>Pesavento J. et al. |
| H4K16ac,H4K20me1                       | Phanstiel D. et al.<br>Pesavento J. et al. |
| H4K16ac,H4K20me1,H4K5ac                | Phanstiel D. et al.<br>Pesavento J. et al. |
| H4K16ac,H4K20me1,H4K5ac,H4K8ac         | Phanstiel D. et al.                        |
| H4K16ac,H4K20me1,H4K8ac                | Phanstiel D. et al.<br>Pesavento J. et al. |
| H4K16ac,H4K20me2                       | Phanstiel D. et al.<br>Pesavento J. et al. |
| H4K16ac,H4K20me2,H4K5ac                | Phanstiel D. et al.<br>Pesavento J. et al. |
| H4K16ac,H4K20me2,H4K5ac,H4K8ac         | Phanstiel D. et al.                        |
| H4K16ac,H4K20me2,H4K5ac,H4K8ac,H4R3me1 | Phanstiel D. et al.                        |
| H4K16ac,H4K20me2,H4K5ac,H4R3me1        | Pesavento J. et al.                        |
| H4K16ac,H4K20me2,H4K5ac,H4R3me2        | Pesavento J. et al.                        |
| H4K16ac,H4K20me2,H4K8ac                | Phanstiel D. et al.<br>Pesavento J. et al. |
| H4K16ac,H4K20me2,H4K8ac,H4R3me1        | Pesavento J. et al.                        |
| H4K16ac,H4K20me2,H4K8ac,H4R3me2        | Pesavento J. et al.                        |
| H4K16ac,H4K20me2,H4R3me1               | Phanstiel D. et al.<br>Pesavento J. et al. |
| H4K16ac,H4K20me2,H4R3me2               | Phanstiel D. et al.<br>Pesavento J. et al. |
| H4K16ac,H4K20me2,H4S1P                 | Phanstiel D. et al.                        |
| H4K16ac,H4K20me3                       | Phanstiel D. et al.<br>Pesavento J. et al. |
| H4K16ac,H4K20me3,H4K5ac,H4K8ac         | Phanstiel D. et al.                        |
| H4K16ac,H4K20me3,H4S1P                 | Phanstiel D. et al.                        |
| H4K16ac,H4K5ac                         | Phanstiel D. et al.                        |

|                                |                                            |
|--------------------------------|--------------------------------------------|
|                                | Pesavento J. et al.                        |
| H4K16ac,H4K5ac,H4K8ac          | Phanstiel D. et al.                        |
| H4K16ac,H4K8ac                 | Phanstiel D. et al.<br>Pesavento J. et al. |
| H4K20me1                       | Phanstiel D. et al.<br>Pesavento J. et al. |
| H4K20me1,H4K5ac                | Phanstiel D. et al.<br>Pesavento J. et al. |
| H4K20me1,H4K5ac,H4K8ac         | Phanstiel D. et al.                        |
| H4K20me1,H4K8ac                | Pesavento J. et al.                        |
| H4K20me2                       | Phanstiel D. et al.<br>Pesavento J. et al. |
| H4K20me2,H4K5ac                | Phanstiel D. et al.<br>Pesavento J. et al. |
| H4K20me2,H4K5ac,H4K8ac         | Phanstiel D. et al.                        |
| H4K20me2,H4K5ac,H4K8ac,H4R3me1 | Phanstiel D. et al.                        |
| H4K20me2,H4K5ac,H4R3me1        | Phanstiel D. et al.                        |
| H4K20me2,H4K8ac                | Phanstiel D. et al.<br>Pesavento J. et al. |
| H4K20me2,H4K8ac,H4R3me1        | Phanstiel D. et al.                        |
| H4K20me2,H4R3me1               | Phanstiel D. et al.<br>Pesavento J. et al. |
| H4K20me2,H4R3me2               | Pesavento J. et al.                        |
| H4K20me2,H4S1P                 | Phanstiel D. et al.                        |
| H4K20me3                       | Phanstiel D. et al.<br>Pesavento J. et al. |
| H4K20me3,H4K5ac                | Phanstiel D. et al.                        |
| H4K20me3,H4K5ac,H4K8ac         | Phanstiel D. et al.                        |
| H4K20me3,H4K8ac                | Phanstiel D. et al.                        |
| H4K20me3,H4S1P                 | Phanstiel D. et al.                        |
| H4K5ac                         | Phanstiel D. et al.<br>Pesavento J. et al. |
| H4K5ac,H4K8ac                  | Phanstiel D. et al.                        |
| H4K8ac                         | Phanstiel D. et al.<br>Pesavento J. et al. |
| H4S1P                          | Phanstiel D. et al.                        |

**Table S2. Number and fraction of distal p300 peaks that have only one histone modification peak.**

|                | <b>B Cell (%)</b> | <b>T Cell (%)</b> | <b>ES Cell (%)</b> |
|----------------|-------------------|-------------------|--------------------|
| <b>H3K4me1</b> | 193 (4.5)         | 78 (3.7)          | 222 (8.1)          |
| <b>H3K4me2</b> | 131 (3.0)         | 8 (0.4)           | 33 (1.2)           |
| <b>H3K4me3</b> | 16 (0.4)          | 83 (4.0)          | 2 (0.1)            |
| <b>H3K9ac</b>  | 72 (1.7)          | 5 (0.2)           | 2 (0.1)            |
| <b>H3K27ac</b> | 143 (3.3)         | 36 (1.7)          | 65 (2.4)           |

**Table S3. Overlap between B cell enhancers from the biclusters in this study and those reported in Ernst et al. [5].** P-values are calculated using cumulative hypergeometric distribution. We use a set of codes to represent these states in a compact and simply way. For instance, the code M12A9 represents the histone mark combination of H3K4me1, H3K4me2, and H3K9ac. The same sets of codes apply to all supplemental tables.

| <b>Bicluster ID</b> | <b># enhancers in bicluster</b> | <b># overlapped enhancer</b> | <b>p-value</b> |
|---------------------|---------------------------------|------------------------------|----------------|
| M12                 | 351                             | 250                          | 0.71           |
| M13                 | 51                              | 30                           | 0.99           |
| M1A9                | 152                             | 133                          | 4.06E-6        |
| M1A27               | 505                             | 470                          | 3.08E-35       |
| M23                 | 636                             | 416                          | 1              |
| M2A9                | 1172                            | 945                          | 1.85E-14       |
| M2A27               | 1442                            | 1189                         | 2.70E-27       |
| M3A9                | 394                             | 241                          | 1              |
| M3A27               | 471                             | 323                          | 0.98           |
| A9A27               | 1270                            | 1016                         | 8.40E-14       |
| M123                | 18                              | 11                           | 0.91           |
| M12A9               | 54                              | 47                           | 0.01           |
| M12A27              | 119                             | 109                          | 1.25E-7        |
| M13A9               | 11                              | 6                            | 0.95           |
| M13A27              | 12                              | 10                           | 0.31           |
| M1A927              | 81                              | 77                           | 1.37E-7        |
| M23A9               | 219                             | 127                          | 1              |
| M23A27              | 251                             | 166                          | 0.99           |
| M2A927              | 629                             | 500                          | 5.60E-6        |
| M3A927              | 207                             | 120                          | 1              |
| M12A927             | 33                              | 31                           | 0.002          |
| M23A927             | 141                             | 81                           | 1              |

**Table S4. Overlap between ES cell enhancers from the biclusters in this study and those reported in Ernst et al. [5].** P-values are calculated using cumulative hypergeometric distribution.

| <b>Bicluster ID</b> | <b># enhancers in bicluster</b> | <b># overlapped enhancer</b> | <b>p-value</b> |
|---------------------|---------------------------------|------------------------------|----------------|
| M12                 | 447                             | 129                          | 5.05E-4        |
| M13                 | 33                              | 13                           | 0.02           |
| M1A9                | 127                             | 61                           | 1.04E-10       |
| M1A27               | 664                             | 221                          | 2.23E-13       |
| M23                 | 371                             | 137                          | 1.28E-11       |
| M2A9                | 342                             | 137                          | 6.61E-15       |
| M2A27               | 1136                            | 338                          | 9.11E-14       |
| M3A9                | 153                             | 55                           | 8.55E-5        |
| M3A27               | 193                             | 51                           | 0.12           |
| M123                | 22                              | 8                            | 0.10           |
| M12A9               | 46                              | 26                           | 5.65E-7        |
| M12A27              | 222                             | 86                           | 1.29E-8        |
| M13A9               | 12                              | 5                            | 0.11           |
| M13A27              | 17                              | 7                            | 0.07           |
| M1A927              | 47                              | 28                           | 4.26E-8        |
| M23A9               | 109                             | 33                           | 0.04           |
| M23A27              | 144                             | 44                           | 0.015          |
| M2A927              | 140                             | 64                           | 4.94E-10       |
| M3A927              | 69                              | 24                           | 0.01           |
| M123A27             | 14                              | 5                            | 0.19           |
| M12A927             | 26                              | 16                           | 2.14E-5        |
| M23A927             | 56                              | 18                           | 0.06           |

**Table S5. Overlap between enhancer biclusters that have more H3K4me1 mark and Premod cis-regulatory modules.** Shown are hypergeometric p-values for the overlaps in all three cell types. Most H3K4me1-negative biclusters in ES cells do not significantly overlap with PreMod CRMs. We believe this is due to the limitation of PreMod because DNA motifs of many ESC-specific TFs were not used in the generation of PreMod CRMs. “-” indicates no bicluster was found.

| <b>Bicluster ID</b> | <b>B Cell</b> | <b>T Cell</b> | <b>ES Cell</b> |
|---------------------|---------------|---------------|----------------|
| M23                 | 0.00278       | 0             | 0.2815         |
| M2A9                | 0.000434      | 0             | 0.9986         |
| M2A27               | 0.347443      | 0             | 1              |
| M3A9                | 0.013469      | 0             | 0.5096         |
| M3A27               | 0.001594      | 0             | 0.2284         |
| A927                | 0.170946      | 0             | -              |
| M23A9               | 0.000298      | 0.0017        | 0.045          |
| M23A27              | 0.03447       | 0.0001        | 0.1536         |
| M2A927              | 0.008988      | 0             | 0.8671         |
| M3A927              | 0.005003      | 0             | 0.3515         |
| M23A927             | 0.038118      | 0.033         | 0.2586         |

## References

1. Garcia BA, Pesavento JJ, Mizzen CA, Kelleher NL: Pervasive combinatorial modification of histone H3 in human cells. *Nat Methods* 2007, 4(6):487-489.
2. LeRoy G, Weston JT, Zee BM, Young NL, Plazas-Mayorca MD, Garcia BA: Heterochromatin protein 1 is extensively decorated with histone code-like post-translational modifications. *Mol Cell Proteomics* 2009, 8(11):2432-2442.
3. Phanstiel D, Brumbaugh J, Berggren WT, Conard K, Feng X, Levenstein ME, McAlister GC, Thomson JA, Coon JJ: Mass spectrometry identifies and quantifies 74 unique histone H4 isoforms in differentiating human embryonic stem cells. *Proc Natl Acad Sci U S A* 2008, 105(11):4093-4098.
4. Pesavento JJ, Bullock CR, LeDuc RD, Mizzen CA, Kelleher NL: Combinatorial modification of human histone H4 quantitated by two-dimensional liquid chromatography coupled with top down mass spectrometry. *J Biol Chem* 2008, 283(22):14927-14937.
5. Ernst J, Kheradpour P, Mikkelsen TS, Shores N, Ward LD, Epstein CB, Zhang X, Wang L, Issner R, Coyne M *et al*: Mapping and analysis of chromatin state dynamics in nine human cell types. *Nature* 2011, 473(7345):43-49.
