# Supplementary material for: Finding combinatorial histone code by semi-supervised biclustering
Source: PubMed Central journal article supplement (PMC3443427; doi:10.1186/1471-2164-13-301), 2012-07-03

**Figure S1. Venn diagram of enhancers in three cell types used as inputs to the biclustering algorithms.** Enhancers were identified as distal p300 ChIP-Seq peaks.

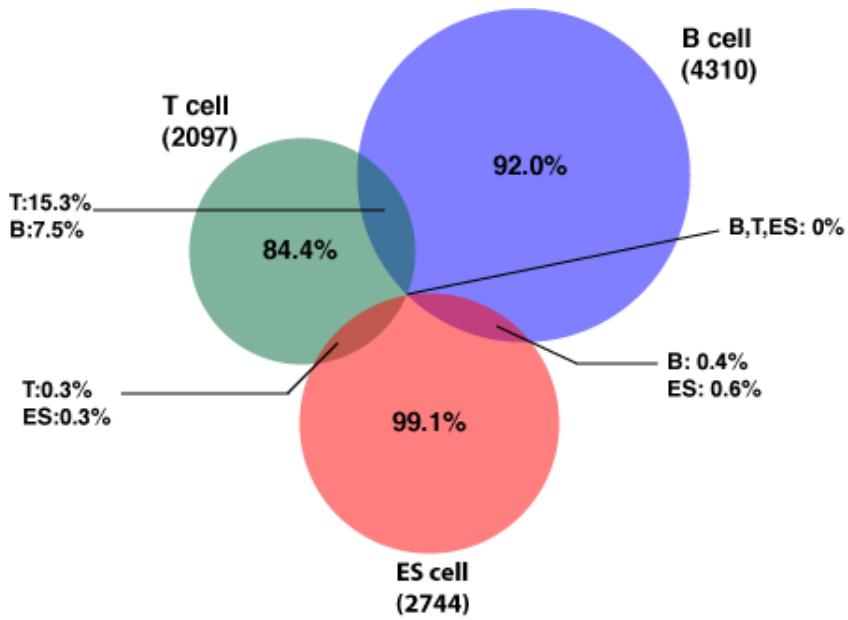

**Figure S3. Promoter coverage of all 26 possible histone states involving at least two histone modification marks.** Y-axis, percentage of enhancers in biclusters that are associated with a given histone state. Histone marks of each state is indicated at the bottom of the histogram. Each column represents a histone state with the filled square indicating the presence of a histone mark in the state and empty square otherwise.

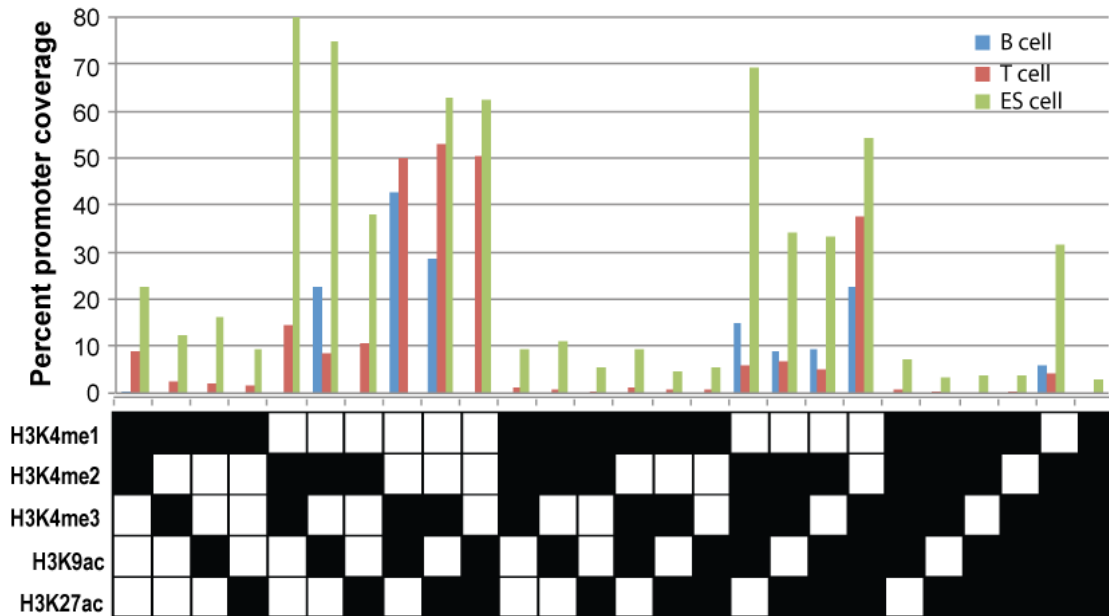

Supplement: 1471-2164-13-301-S2.pdf [file 1471-2164-13-301-S2.pdf]
