# Supplementary material for: Finding combinatorial histone code by semi-supervised biclustering
Source: PubMed Central journal article supplement (PMC3443427; doi:10.1186/1471-2164-13-301), 2012-07-03
Supplement: 1471-2164-13-301-S3.pdf [file 1471-2164-13-301-S3.pdf]

## Figure S2. Pseudo code for the semi-supervised CoSBI algorithm

Three dimensions of the input GCP matrix are Genomic loci, Chromatin modifications, and ChIP-seq signal Positions. Output is the set of biclusters.

**Input:** 3D GCP data, prior co-occurrence probability matrix  $P$   
 $\alpha, \beta, \min_g, \min_s$

**Output:** set of coherent biclusters  $\{Bi_{ij}\}$

**Begin**

for each genomic locus{

generate histone mark similarity  $C$ ;

$D_{ij} = 1 - C_{ij}$  ; //convert similarity matrix to distance matrix

$D'_{ij} = D_{ij} \times (1 - P_{ij})$  ; //incorporate prior knowledge to the biclustering process

$D' = \text{all-pair-shortest-path}(D')$  ; // update the distance matrix

$C'_{ij} = 1 - D'_{ij}$  ; // convert distance matrix back to similarity matrix

$\text{maximal\_sample\_sets} = \text{depth-first-search}(C', \beta)$  ; //identify all maximal sample sets

}

$\{Bi_{ij}\} = \text{tree\_enumeration}(\{\text{maximal\_sample\_sets}\}, \alpha, \min_g, \min_s)$

$\{Bi_{ij}\} = \text{merging}\{\{Bi_{ij}\}\}$ ;

**End**
